# Supplementary material for: High-field multinuclear MAS NMR and synchrotron XANES reveal the influence of strontium salt chemistry on geopolymer nanostructure
Source: Royal Society of Chemistry journal article supplement (doi:10.1039/d6dt00775a), 2026-06-17
Supplement: d6dt00775a1.pdf [file d6dt00775a1.pdf]

## Supporting Information for

# High-field multinuclear MAS NMR and synchrotron XANES reveal the influence of strontium salt chemistry on geopolymer nanostructure

Kyle T. O'Donoghue<sup>1</sup>, Daniel A. Geddes<sup>1</sup>, Tom J. Wilkinson<sup>1</sup>, Martin C. Stennett<sup>1</sup>, Byoungkwan Kim<sup>1</sup>, Dinu Iuga<sup>2</sup>, Martin Hayes<sup>3</sup>, Brant Walkley<sup>1\*</sup>

<sup>1</sup>*School of Chemical, Materials and Biological Engineering, The University of Sheffield, Sheffield, UK*

<sup>2</sup>*Department of Physics, University of Warwick, Coventry, UK*

<sup>3</sup>*United Kingdom National Nuclear Laboratory, Warrington, UK*

Corresponding author: Email: [b.walkley@sheffield.ac.uk](mailto:b.walkley@sheffield.ac.uk)



|      |         | )  |    |    |   |             | <b>reaction<br/>(%)</b> |
|------|---------|----|----|----|---|-------------|-------------------------|
| KGP  | 3 Days  | 25 | 54 | 20 | 1 | <b>1.32</b> | <b>82.17</b>            |
| OH_5 | 3 Days  | 27 | 35 | 34 | 4 | <b>1.40</b> | <b>87.28</b>            |
| KGP  | 28 Days | 28 | 44 | 26 | 2 | <b>1.34</b> | <b>88.00</b>            |
| OH_5 | 28 Days | 31 | 32 | 30 | 7 | <b>1.39</b> | <b>87.44</b>            |

\* Estimated error due to spectral noise is  $\pm 2\%$

## 2. Effect of addition of strontium carbonate to geopolymers

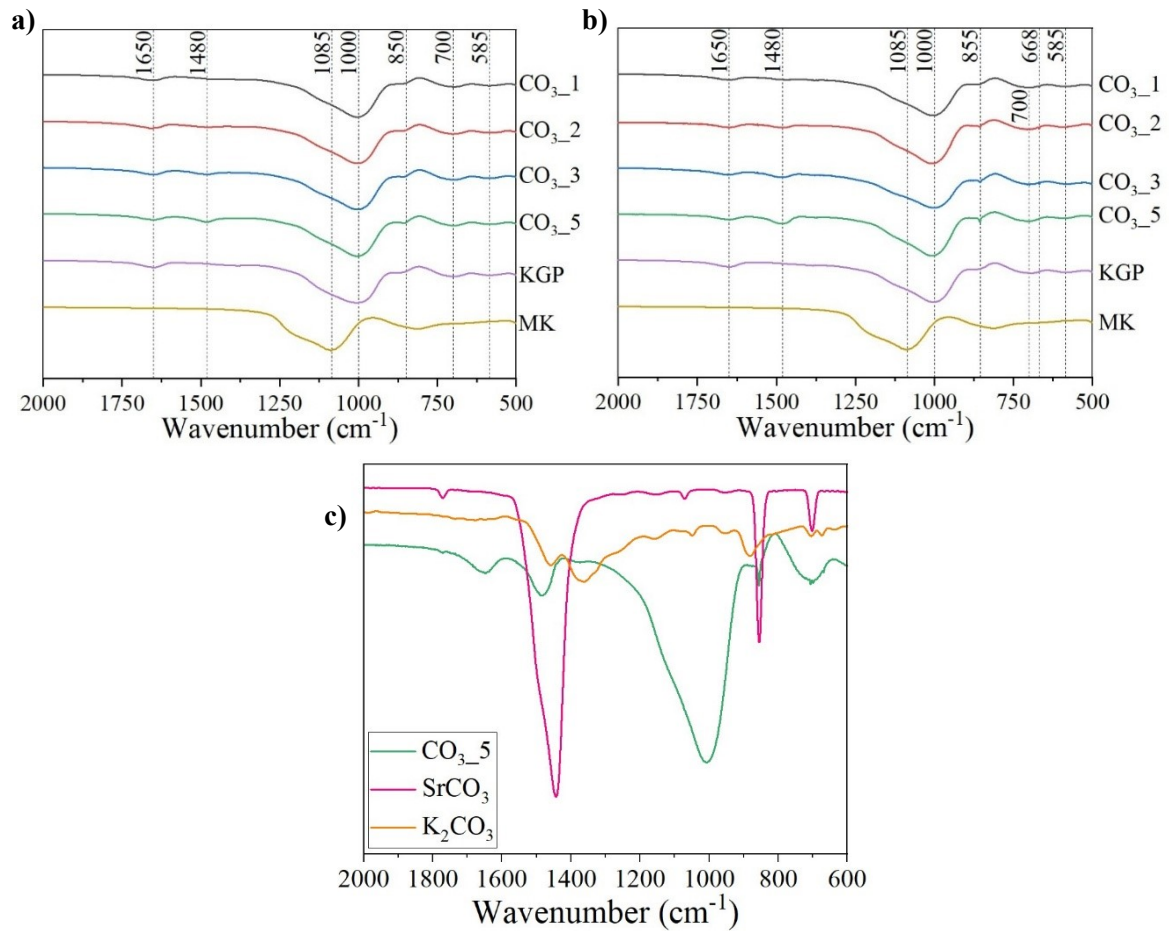

**Figure S3:** FTIR data for the geopolymers cured for a) 3 and b) 28 days, as a function of the amount of SrCO<sub>3</sub> (wt. %) in the formulation, and unreacted metakaolin (MK), as well as c) FTIR data for the CO<sub>3\_5</sub> sample compared against that of reagents SrCO<sub>3</sub> and K<sub>2</sub>CO<sub>3</sub>.

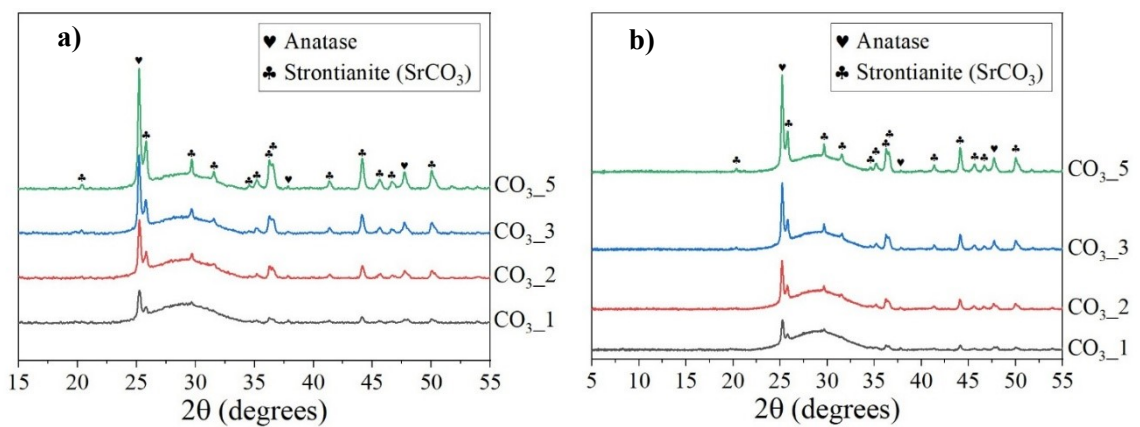

**Figure S4:** X-ray diffraction data for the geopolymers cured for a) 3 and b) 28 days, as a function of the amount of SrCO<sub>3</sub> (wt. %) in the formulation.

**Table S2:** Relative integral areas for Q<sup>4</sup>(mAl) sites and Si/Al ratios within K-A-S-H in each sample, as well as extent of reaction (mol. %), calculated from the deconvoluted <sup>29</sup>Si MAS NMR spectra

| Sample             | Time point | Relative Integral Area (%) |                      |                      |                      | Si/Al       | Extent of reaction (%) |
|--------------------|------------|----------------------------|----------------------|----------------------|----------------------|-------------|------------------------|
|                    |            | Q <sup>4</sup> (4Al)       | Q <sup>4</sup> (3Al) | Q <sup>4</sup> (2Al) | Q <sup>4</sup> (1Al) |             |                        |
| KGP                | 3 Days     | 25                         | 54                   | 20                   | 1                    | <b>1.32</b> | <b>82.17</b>           |
| CO <sub>3</sub> _5 | 3 Days     | 24                         | 49                   | 23                   | 4                    | <b>1.37</b> | <b>80.73</b>           |
| KGP                | 28 Days    | 28                         | 44                   | 26                   | 2                    | <b>1.34</b> | <b>88.00</b>           |
| CO <sub>3</sub> _5 | 28 Days    | 24                         | 48                   | 27                   | 1                    | <b>1.36</b> | <b>83.01</b>           |

### 3. Effect of addition of strontium nitrate to geopolymers

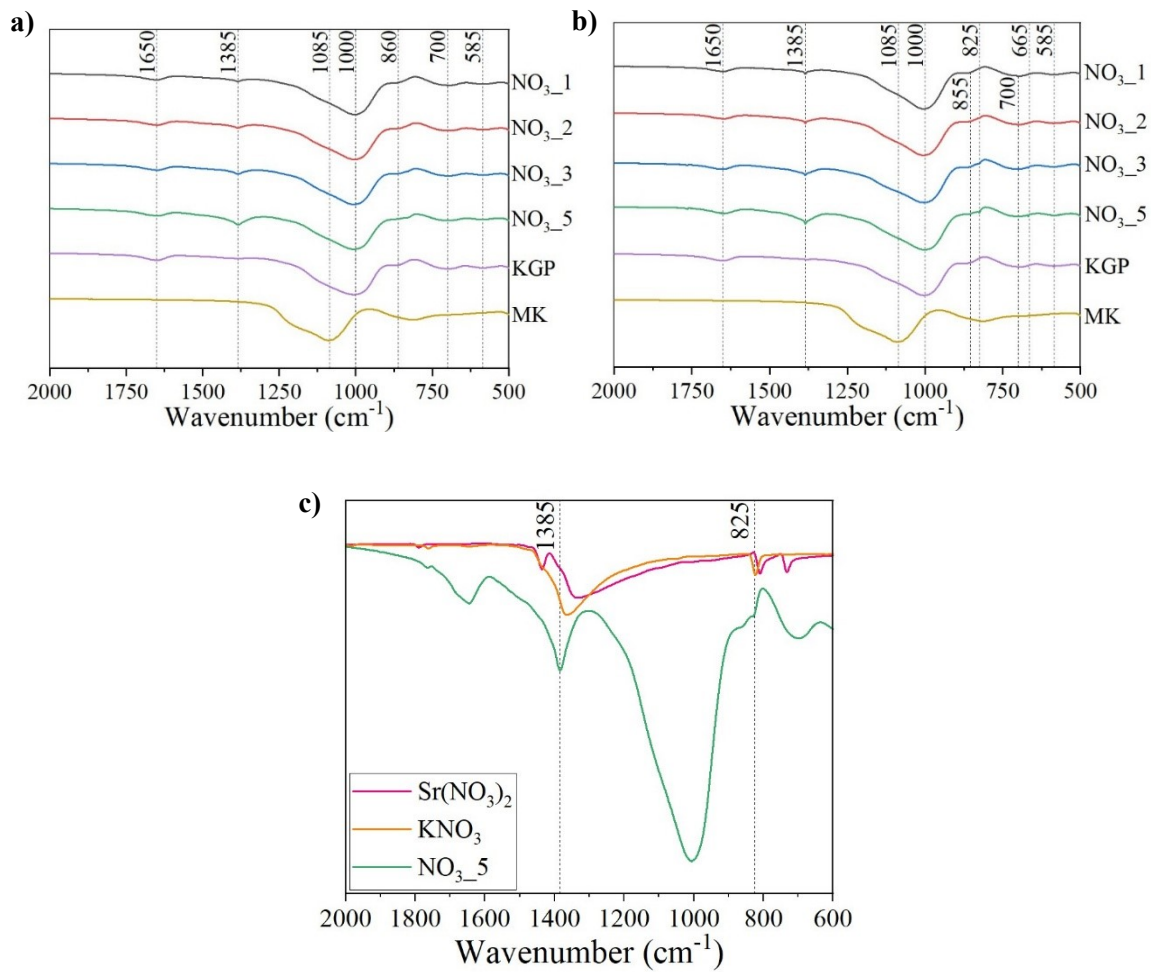

**Figure S5:** FTIR data for the geopolymers cured for a) 3 and b) 28 days, as a function of the amount of  $\text{Sr}(\text{NO}_3)_2$  (wt. %) in the formulation, and unreacted metakaolin (MK). FTIR data for the reagents used to produce the geopolymer samples are shown in c).

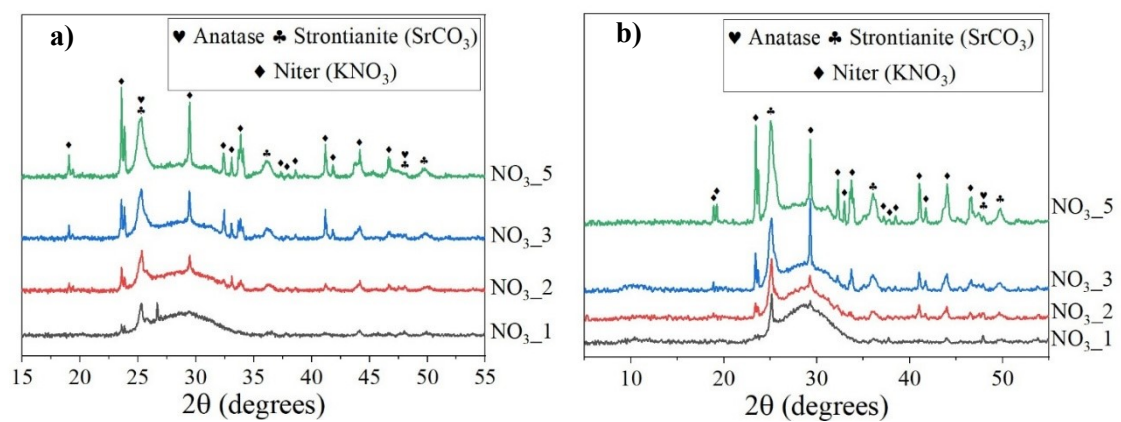

**Figure S6:** X-ray diffraction data for the geopolymers cured for a) 3 and b) 28 days, as a function of the amount of  $\text{Sr}(\text{NO}_3)_2$  (wt. %) in the formulation.

**Table S3:** Relative integral areas for Q<sup>4</sup>(mAl) sites and Si/Al ratios within K-A-S-H in each sample, as well as extent of reaction (mol. %), calculated from the deconvoluted <sup>29</sup>Si MAS NMR spectra

| Sample             | Time point | Relative Integral Area (%) |                      |                      |                      | Si/Al       | Extent of reaction (%) |
|--------------------|------------|----------------------------|----------------------|----------------------|----------------------|-------------|------------------------|
|                    |            | Q <sup>4</sup> (4Al)       | Q <sup>4</sup> (3Al) | Q <sup>4</sup> (2Al) | Q <sup>4</sup> (1Al) |             |                        |
| KGP                | 3 Days     | 25                         | 54                   | 20                   | 1                    | <b>1.32</b> | <b>82.17</b>           |
| NO <sub>3</sub> _5 | 3 Days     | 30                         | 38                   | 30                   | 2                    | <b>1.35</b> | <b>73.32</b>           |
| KGP                | 28 Days    | 28                         | 44                   | 26                   | 2                    | <b>1.34</b> | <b>88.00</b>           |
| NO <sub>3</sub> _5 | 28 Days    | 39                         | 40                   | 20                   | 1                    | <b>1.26</b> | <b>77.73</b>           |

#### 4. Effect of addition of strontium sulfate to geopolymers

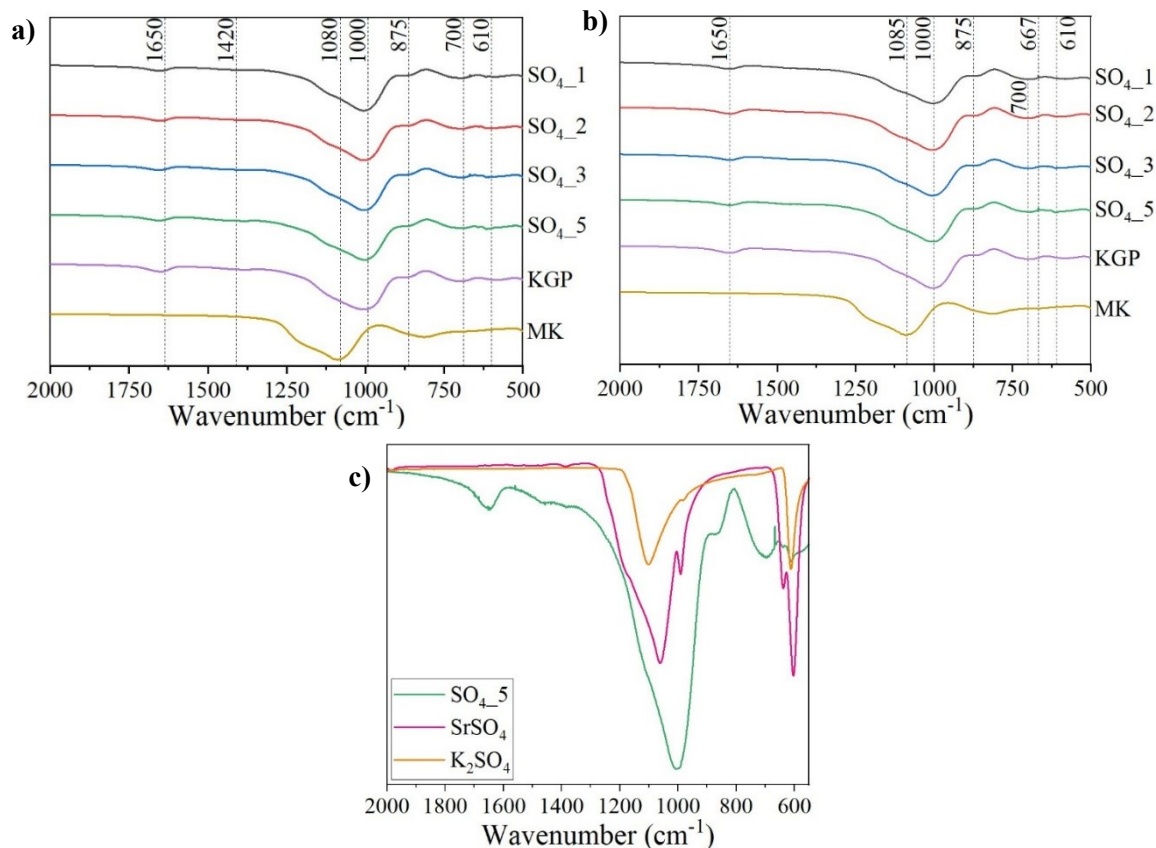

**Figure S7:** FTIR data for the geopolymers cured for 3 and 28 days, as a function of the amount of  $\text{SrSO}_4$  (wt. %) in the formulation, the control geopolymer sample, unreacted metakaolin (MK), and  $\text{SrSO}_4$  and  $\text{K}_2\text{SO}_4$  reagents.

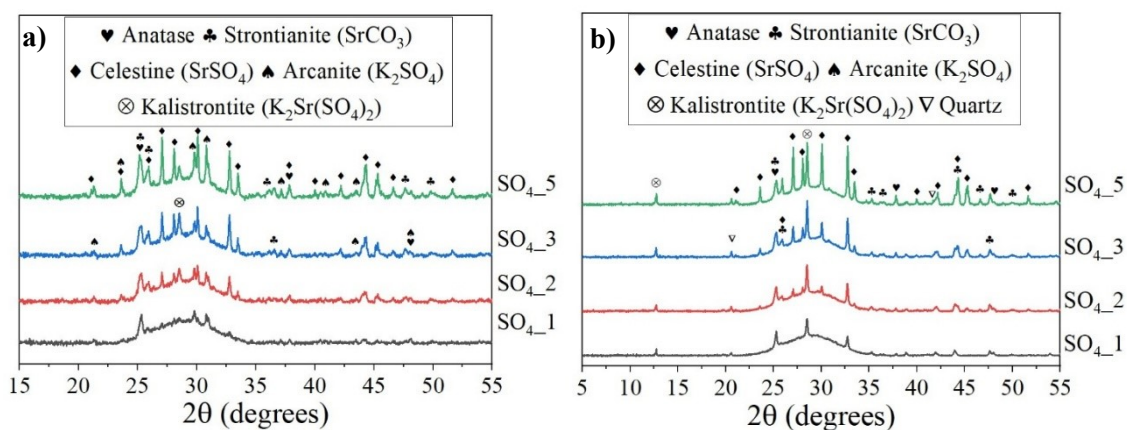

**Figure S8:** X-ray diffraction data for the geopolymers cured for a) 3 and b) 28 days, as a function of the amount of  $\text{SrSO}_4$  (wt. %) in the formulation.

**Table S4:** Relative integral areas for Q<sup>4</sup>(mAl) sites and Si/Al ratios within K-A-S-H in each sample, as well as extent of reaction (mol. %), calculated from the deconvoluted <sup>29</sup>Si MAS NMR spectra

| Sample             | Time point | Relative Integral Area (%) |                      |                      |                      | Si/Al       | Extent of reaction (%) |
|--------------------|------------|----------------------------|----------------------|----------------------|----------------------|-------------|------------------------|
|                    |            | Q <sup>4</sup> (4Al)       | Q <sup>4</sup> (3Al) | Q <sup>4</sup> (2Al) | Q <sup>4</sup> (1Al) |             |                        |
| KGP                | 3 Days     | 25                         | 54                   | 20                   | 1                    | <b>1.32</b> | <b>82.17</b>           |
| SO <sub>4</sub> _5 | 3 Days     | 25                         | 33                   | 37                   | 5                    | <b>1.37</b> | <b>84.40</b>           |
| KGP                | 28 Days    | 28                         | 44                   | 26                   | 2                    | <b>1.34</b> | <b>88.00</b>           |
| SO <sub>4</sub> _5 | 28 Days    | 31                         | 34                   | 28                   | 7                    | <b>1.36</b> | <b>86.61</b>           |
